# Supplementary material for: Development of a Systematic qPCR Array for Screening GM Soybeans
Source: PubMed Central journal article supplement (PMC8001275; doi:10.3390/foods10030610), 2021-03-13
Supplement: foods-10-00610-s001.pdf [file foods-10-00610-s001.pdf]

**Supplementary data 1. The results of monitoring test using universal screening method**

| Product type   | Sample no. | Results |       |       | Events expected to be mixed in samples                                                                                                                                      |
|----------------|------------|---------|-------|-------|-----------------------------------------------------------------------------------------------------------------------------------------------------------------------------|
|                |            | lectin  | P-35S | T-nos |                                                                                                                                                                             |
| Soybean Powder | 1          | +       | -     | -     | MON87701, MON87705, MON87708, MON87751, MON87769, MON89788, DP305423-1, DP356043-5, CV127, DAS-44406-6, DAS-68416-4, DAS-81419-2                                            |
|                | 2          | +       | -     | -     |                                                                                                                                                                             |
|                | 3          | +       | -     | -     |                                                                                                                                                                             |
| Dried Cereal   | 4          | +       | -     | -     |                                                                                                                                                                             |
|                | 5          | +       | -     | -     |                                                                                                                                                                             |
|                | 6          | +       | -     | -     |                                                                                                                                                                             |
|                | 7          | +       | -     | -     |                                                                                                                                                                             |
|                | 8          | +       | -     | -     |                                                                                                                                                                             |
|                | 9          | +       | -     | -     |                                                                                                                                                                             |
|                | 10         | +       | -     | -     |                                                                                                                                                                             |
|                | 11         | +       | -     | -     |                                                                                                                                                                             |
| Soy Milk       | 12         | +       | +     | +     | RRS, FG72, A2704-12, A5547-127, SYHT0H2<br>MON87701, MON87705, MON87708, MON87751, MON87769, MON89788, DP305423-1, DP356043-5, CV127, DAS-44406-6, DAS-68416-4, DAS-81419-2 |
| Tofu           | 13         | +       | +     | +     | RRS, FG72, A2704-12, A5547-127, SYHT0H2<br>MON87701, MON87705, MON87708, MON87751, MON87769, MON89788, DP305423-1, DP356043-5, CV127, DAS-44406-6, DAS-68416-4, DAS-81419-2 |
|                | 14         | +       | -     | -     | MON87701, MON87705, MON87708, MON87751, MON87769, MON89788, DP305423-1, DP356043-5, CV127, DAS-44406-6, DAS-68416-4, DAS-81419-2                                            |
|                | 15         | +       | +     | +     | RRS, FG72, A2704-12, A5547-127, SYHT0H2<br>MON87701, MON87705, MON87708, MON87751, MON87769, MON89788, DP305423-1, DP356043-5, CV127, DAS-44406-6, DAS-68416-4, DAS-81419-2 |
|                | 16         | +       | +     | +     | RRS, FG72, A2704-12, A5547-127, SYHT0H2<br>MON87701, MON87705, MON87708, MON87751, MON87769, MON89788, DP305423-1, DP356043-5, CV127, DAS-44406-6, DAS-68416-4, DAS-81419-2 |
|                | 17         | +       | +     | +     | RRS, FG72, A2704-12, A5547-127, SYHT0H2<br>MON87701, MON87705, MON87708, MON87751, MON87769, MON89788, DP305423-1, DP356043-5, CV127, DAS-44406-6, DAS-68416-4, DAS-81419-2 |

|       |    |   |   |   |                                                                                                                                                                                |
|-------|----|---|---|---|--------------------------------------------------------------------------------------------------------------------------------------------------------------------------------|
|       | 18 | + | + | + | RRS, FG72, A2704-12, A5547-127, SYHT0H2<br>MON87701, MON87705, MON87708, MON87751, MON87769, MON89788, DP305423-1, DP356043-5,<br>CV127, DAS-44406-6, DAS-68416-4, DAS-81419-2 |
|       | 19 | + | - | + | RRS, FG72,<br>MON87701, MON87705, MON87708, MON87751, MON87769, MON89788, DP305423-1, DP356043-5,<br>CV127, DAS-44406-6, DAS-68416-4, DAS-81419-2                              |
|       | 20 | + | + | + | RRS, FG72, A2704-12, A5547-127, SYHT0H2<br>MON87701, MON87705, MON87708, MON87751, MON87769, MON89788, DP305423-1, DP356043-5,<br>CV127, DAS-44406-6, DAS-68416-4, DAS-81419-2 |
|       | 21 | + | - | + | RRS, FG72,<br>MON87701, MON87705, MON87708, MON87751, MON87769, MON89788, DP305423-1, DP356043-5,<br>CV127, DAS-44406-6, DAS-68416-4, DAS-81419-2                              |
|       | 22 | + | - | + | RRS, FG72,<br>MON87701, MON87705, MON87708, MON87751, MON87769, MON89788, DP305423-1, DP356043-5,<br>CV127, DAS-44406-6, DAS-68416-4, DAS-81419-2                              |
| Snack | 23 | + | - | - | MON87701, MON87705, MON87708, MON87751, MON87769, MON89788, DP305423-1, DP356043-5,<br>CV127, DAS-44406-6, DAS-68416-4, DAS-81419-2                                            |

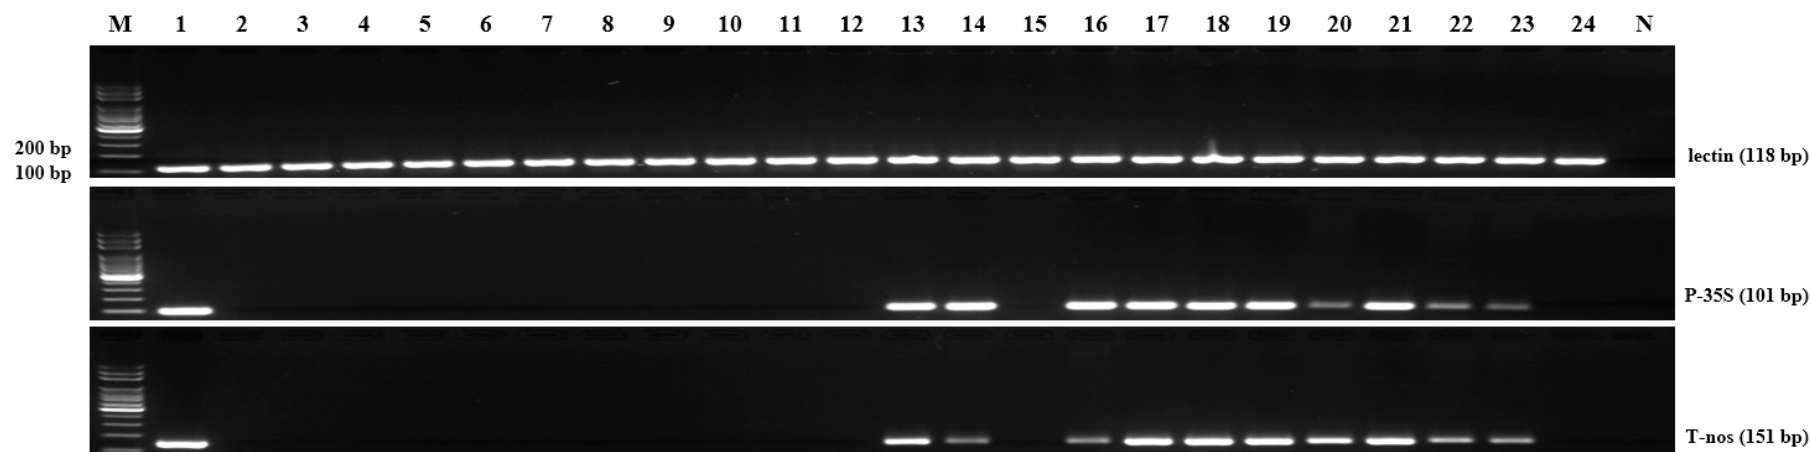

Lane M, 100 bp DNA Ladder; lane 1, Positive control; lanes 2-24, processed foods samples 1-23; lane N, no template
